# Supplementary material for: Chloride ions evoke taste sensations by binding to the extracellular ligand-binding domain of sweet/umami taste receptors
Source: eLife. 2023 Feb 28;12:e84291. doi: 10.7554/eLife.84291 (PMC9977269; doi:10.7554/eLife.84291)
Supplement: Figure 3—source data 1. [file elife-84291-fig3-data1.xlsx]

## Sheet: Panel A
Temperature (˚C)	Fluorecence intensity, Cl- 0 mM	Fluorecence intensity, Cl- 0.003 mM	Fluorecence intensity, Cl- 0.01 mM	Fluorecence intensity, Cl- 0.03 mM	Fluorecence intensity, Cl- 0.1 mM	Fluorecence intensity, Cl- 0.3 mM	Fluorecence intensity, Cl- 1 mM	Fluorecence intensity, Cl- 3 mM	Fluorecence intensity, Cl- 10 mM
25.0327	188472
25.2774	188260
25.5221	188053
25.7668	187850
26.0115	187651
26.2562	187456
26.5009	187264
26.7456	187090
26.9903	187011
27.2351	186982
27.4798	186998
27.7245	187058
27.9692	187163
28.2139	187314
28.4586	187496
28.7033	187695
28.948	187903
29.1927	188122
29.4374	188360
29.6821	188625
29.9268	188918
30.1715	189244
30.4162	189611
30.6609	190026
30.9056	190494
31.1503	191013
31.395	191578
31.6397	192178
31.8844	192807
32.1292	193469
32.3739	194165
32.6186	194893
32.8633	195652
33.108	196444
33.3527	197277
33.5974	198158
33.8421	199089
34.0868	200073
34.3315	201118
34.5762	202231
34.8209	203417
35.0656	204676
35.3103	206000
35.555	207387
35.7997	208842
36.0444	210372
36.2891	211986
36.5338	213675
36.7786	215429
37.0233	217247
37.268	219137
37.5127	221102
37.7574	223140
38.0021	225244
38.2468	227414
38.4915	229657
38.7362	231979
38.9809	234376
39.2256	236840
39.4703	239370
39.715	241970
39.9597	244648
40.2044	247406
40.4491	250236
40.6938	253127
40.9385	256064
41.1832	259050
41.4279	262088
41.6726	265172
41.9174	268294
42.1621	271453
42.4068	274641
42.6515	277847
42.8962	281071
43.1409	284322
43.3856	287601
43.6303	290908
43.875	294229
44.1197	297554
44.3644	300880
44.6091	304209
44.8538	307547
45.0985	310880
45.3432	314187
45.5879	317441
45.8326	320643
46.0773	323801
46.322	326904
46.5667	329936
46.8115	332880
47.0562	335722
47.3009	338460
47.5456	341086
47.7903	343594
48.035	345964
48.2797	348185
48.5244	350250
48.7691	352158
49.0138	353921
49.2585	355552
49.5032	357056
49.7479	358445
49.9926	359736
50.2373	360930
50.482	362030
50.7267	363041
50.9714	363952
51.2161	364762
51.4609	365481
51.7056	366112
51.9503	366648
52.195	367081
52.4397	367407
52.6844	367637
52.9291	367787
53.1738	367870
53.4185	367891
53.6632	367836
53.9079	367691
54.1526	367465
54.3973	367171
54.642	366816
54.8867	366393
55.1314	365898
55.3761	365333
55.6208	364704
55.8655	364029
56.1103	363321
56.355	362569
56.5997	361745
56.8444	360836
57.0891	359842
57.3338	358764
57.5785	357606
57.8232	356362
58.0679	355026
58.3126	353594
58.5573	352069
58.802	350471
59.0467	348818
59.2914	347118
59.5361	345378
59.7808	343609
60.0255	341820
60.2702	340016
60.5149	338200
60.7596	336377
61.0044	334548
61.2491	332715
61.4938	330880
61.7385	329041
61.9832	327194
62.2279	325333
62.4726	323466
62.7173	321607
62.962	319765
63.2067	317929
63.4514	316079
63.6961	314211
63.9408	312335
64.1855	310466
64.4302	308609
64.6749	306758
64.9196	304908
65.1643	303067
65.409	301242
65.6538	299430
65.8984	297620
66.1432	295802
66.3879	293986
66.6326	292195
66.8773	290442
67.122	288718
67.3667	287002
67.6114	285287
67.8561	283586
68.1008	281904
68.3455	280228
68.5902	278538
68.8349	276826
69.0796	275105
69.3243	273394
69.569	271694
69.8137	269998
70.0584	268308
70.3031	266633
70.5478	264987
70.7926	263367
71.0373	261753
71.282	260127
71.5267	258495
71.7714	256882
72.0161	255302
72.2608	253748
72.5055	252198
72.7502	250648
72.9949	249110
73.2396	247590
73.4843	246085
73.729	244580
73.9737	243062
74.2184	241530
74.4631	239990
74.7078	238450
74.9525	236909
75.1972	235360
75.442	233810
75.6867	232276
75.9314	230765
76.1761	229269
76.4208	227780
76.6655	226294
76.9102	224811
77.1549	223334
77.3996	221861
77.6443	220393
77.889	218927
78.1337	217455
78.3784	215981
78.6231	214509
78.8678	213044
79.1125	211589
79.3572	210140
79.6019	208689
79.8466	207240
80.0913	205804
80.336	204384
80.5807	202979
80.8255	201587
81.0702	200214
81.3149	198862
81.5596	197534
81.8043	196225
82.049	194929
82.2937	193640
82.5384	192356
82.7831	191081
83.0278	189813
83.2725	188542
83.5172	187258
83.7619	185968
84.0066	184674
84.2513	183381
84.496	182095
84.7407	180819
84.9854	179552
85.2301	178290
85.4749	177028
85.7196	175770
85.9643	174517
86.209	173262
86.4537	172004
86.6984	170747
86.9431	169487
87.1878	168231
87.4325	166987
87.6772	165756
87.9219	164537
88.1666	163327
88.4113	162124
88.656	160932
88.9007	159749
89.1454	158574
89.3901	157409
89.6348	156253
89.8795	155101
90.1243	153951
90.369	152797
90.6137	151636
90.8584	150468
91.1031	149297
91.3478	148128
91.5925	146964
91.8372	145809
92.0819	144660
92.3266	143516
92.5713	142387
92.816	141274
93.0607	140173
93.3054	139072
93.5501	137967
93.7948	136868
94.0395	135782
94.2842	134714
94.5289	133665
94.7736	132629
95.0183	131598
95.2631	130572
95.5078	129558
95.7525	128558
95.9972	127564
96.2419	126568
96.4866	125565
96.7313	124554
96.976	123543
97.2207	122533
97.4654	121524
97.7101	120515
97.9548	119506
25.0304		188472
25.2751		188041
25.5198		187624
25.7645		187218
26.0092		186821
26.2539		186429
26.4986		186040
26.7433		185676
26.988		185457
27.2327		185308
27.4775		185222
27.7222		185191
27.9669		185213
28.2116		185287
28.4563		185420
28.701		185605
28.9457		185826
29.1904		186076
29.4351		186353
29.6798		186655
29.9245		186979
30.1692		187321
30.4139		187688
30.6586		188089
30.9033		188535
31.148		189027
31.3927		189560
31.6374		190131
31.8821		190738
32.1268		191387
32.3716		192080
32.6163		192816
32.861		193594
33.1057		194414
33.3504		195278
33.5951		196190
33.8398		197154
34.0845		198171
34.3292		199236
34.5739		200351
34.8186		201522
35.0633		202758
35.308		204066
35.5527		205449
35.7974		206909
36.0421		208443
36.2868		210049
36.5315		211729
36.7762		213487
37.0209		215322
37.2657		217228
37.5104		219197
37.7551		221230
37.9998		223328
38.2445		225494
38.4892		227733
38.7339		230047
38.9786		232437
39.2233		234902
39.468		237434
39.7127		240028
39.9574		242682
40.2021		245402
40.4468		248190
40.6915		251048
40.9362		253967
41.1809		256941
41.4256		259971
41.6703		263057
41.9151		266194
42.1598		269371
42.4045		272582
42.6492		275820
42.8939		279081
43.1386		282362
43.3833		285659
43.628		288969
43.8727		292292
44.1174		295628
44.3621		298971
44.6068		302314
44.8515		305639
45.0962		308939
45.3409		312207
45.5856		315427
45.8303		318586
46.075		321684
46.3197		324716
46.5645		327668
46.8092		330533
47.0539		333305
47.2986		335982
47.5433		338560
47.788		341030
48.0327		343380
48.2774		345598
48.5221		347673
48.7668		349614
49.0115		351427
49.2562		353110
49.5009		354658
49.7456		356072
49.9903		357358
50.235		358522
50.4797		359567
50.7244		360496
50.9691		361310
51.2138		362012
51.4586		362607
51.7033		363104
51.948		363515
52.1927		363845
52.4374		364096
52.6821		364267
52.9268		364358
53.1715		364364
53.4162		364284
53.6609		364120
53.9056		363878
54.1503		363566
54.395		363189
54.6397		362743
54.8844		362223
55.1291		361623
55.3738		360948
55.6185		360210
55.8632		359408
56.1079		358526
56.3526		357553
56.5974		356490
56.8421		355354
57.0868		354160
57.3315		352907
57.5762		351589
57.8209		350204
58.0656		348756
58.3103		347258
58.555		345710
58.7997		344108
59.0444		342448
59.2891		340738
59.5338		338992
59.7785		337217
60.0232		335415
60.2679		333580
60.5126		331714
60.7573		329828
61.002		327938
61.2467		326047
61.4915		324154
61.7362		322252
61.9809		320349
62.2256		318463
62.4703		316606
62.715		314777
62.9597		312963
63.2044		311153
63.4491		309345
63.6938		307539
63.9385		305734
64.1832		303921
64.4279		302093
64.6726		300255
64.9173		298415
65.162		296581
65.4067		294750
65.6514		292924
65.8962		291107
66.1409		289309
66.3856		287530
66.6303		285762
66.875		284003
67.1197		282254
67.3644		280518
67.6091		278798
67.8538		277089
68.0985		275389
68.3432		273703
68.5879		272034
68.8326		270382
69.0773		268744
69.322		267116
69.5667		265500
69.8114		263897
70.0561		262310
70.3008		260737
70.5455		259177
70.7902		257629
71.0349		256101
71.2797		254599
71.5244		253126
71.7691		251681
72.0138		250260
72.2585		248856
72.5032		247459
72.7479		246061
72.9926		244656
73.2373		243238
73.482		241807
73.7267		240363
73.9714		238903
74.2161		237428
74.4608		235940
74.7055		234445
74.9502		232951
75.1949		231466
75.4396		229991
75.6843		228526
75.9291		227070
76.1738		225627
76.4185		224199
76.6632		222784
76.9079		221381
77.1526		219986
77.3973		218594
77.642		217200
77.8867		215802
78.1314		214405
78.3761		213008
78.6208		211614
78.8655		210225
79.1102		208840
79.3549		207456
79.5996		206073
79.8443		204694
80.089		203317
80.3337		201940
80.5784		200560
80.8231		199180
81.0679		197800
81.3126		196420
81.5573		195047
81.802		193685
82.0467		192335
82.2914		190997
82.5361		189669
82.7808		188353
83.0255		187050
83.2702		185763
83.5149		184492
83.7596		183235
84.0043		181989
84.249		180754
84.4937		179529
84.7384		178311
84.9831		177096
85.2278		175882
85.4725		174668
85.7173		173452
85.962		172233
86.2067		171010
86.4514		169780
86.6961		168544
86.9408		167305
87.1855		166065
87.4302		164827
87.6749		163592
87.9196		162360
88.1643		161134
88.409		159916
88.6537		158710
88.8984		157521
89.1431		156348
89.3878		155188
89.6325		154034
89.8772		152888
90.1219		151751
90.3667		150627
90.6114		149516
90.8561		148415
91.1008		147322
91.3455		146232
91.5902		145144
91.8349		144060
92.0796		142981
92.3243		141903
92.569		140823
92.8137		139743
93.0584		138663
93.3031		137588
93.5478		136520
93.7925		135457
94.0372		134399
94.2819		133348
94.5266		132305
94.7713		131275
95.016		130258
95.2608		129250
95.5055		128248
95.7502		127250
95.9949		126258
96.2396		125271
96.4843		124287
96.729		123304
96.9737		122321
97.2184		121337
97.4631		120352
97.7078		119367
97.9525		118382
25.101			188472
25.3457			188102
25.5904			187739
25.8351			187382
26.0798			187030
26.3245			186683
26.5693			186339
26.814			186009
27.0587			185772
27.3034			185585
27.5481			185449
27.7928			185363
28.0375			185324
28.2822			185328
28.5269			185368
28.7716			185440
29.0163			185540
29.261			185667
29.5057			185822
29.7504			186004
29.9951			186219
30.2398			186471
30.4845			186763
30.7292			187102
30.9739			187490
31.2186			187925
31.4634			188398
31.7081			188906
31.9528			189445
32.1975			190015
32.4422			190618
32.6869			191255
32.9316			191929
33.1763			192642
33.421			193400
33.6657			194212
33.9104			195081
34.1551			196013
34.3998			197010
34.6445			198074
34.8892			199202
35.1339			200387
35.3786			201630
35.6233			202930
35.868			204288
36.1127			205711
36.3575			207200
36.6022			208755
36.8469			210378
37.0916			212074
37.3363			213850
37.581			215705
37.8257			217633
38.0704			219623
38.3151			221675
38.5598			223792
38.8045			225978
39.0492			228232
39.2939			230551
39.5386			232932
39.7833			235378
40.028			237891
40.2727			240472
40.5174			243116
40.7621			245812
41.0068			248549
41.2516			251327
41.4963			254152
41.741			257025
41.9857			259936
42.2304			262882
42.4751			265866
42.7198			268893
42.9645			271967
43.2092			275084
43.4539			278234
43.6986			281402
43.9433			284576
44.188			287748
44.4327			290913
44.6774			294060
44.9221			297179
45.1668			300264
45.4115			303312
45.6562			306319
45.901			309283
46.1457			312202
46.3904			315070
46.6351			317878
46.8798			320615
47.1245			323274
47.3692			325843
47.6139			328313
47.8586			330671
48.1033			332900
48.348			334993
48.5927			336948
48.8374			338763
49.0821			340433
49.3268			341954
49.5715			343329
49.8162			344571
50.0609			345692
50.3056			346696
50.5503			347587
50.7951			348376
51.0398			349066
51.2845			349665
51.5292			350177
51.7739			350599
52.0186			350928
52.2633			351170
52.508			351333
52.7527			351420
52.9974			351436
53.2421			351384
53.4868			351273
53.7315			351116
53.9762			350914
54.2209			350667
54.4656			350376
54.7103			350034
54.955			349633
55.1997			349172
55.4444			348651
55.6891			348065
55.9339			347414
56.1786			346694
56.4233			345896
56.668			345022
56.9127			344077
57.1574			343066
57.4021			341996
57.6468			340868
57.8915			339677
58.1362			338427
58.3809			337121
58.6256			335762
58.8703			334354
59.115			332892
59.3597			331372
59.6044			329799
59.8491			328181
60.0938			326528
60.3385			324853
60.5833			323162
60.828			321457
61.0727			319749
61.3174			318047
61.5621			316358
61.8068			314683
62.0515			313017
62.2962			311355
62.5409			309695
62.7856			308032
63.0303			306361
63.275			304678
63.5197			302977
63.7644			301254
64.0091			299518
64.2538			297773
64.4985			296021
64.7432			294263
64.9879			292502
65.2327			290748
65.4774			289008
65.7221			287284
65.9668			285573
66.2115			283868
66.4562			282170
66.7009			280484
66.9456			278816
67.1903			277162
67.435			275516
67.6797			273871
67.9244			272230
68.1691			270594
68.4138			268966
68.6585			267346
68.9032			265733
69.1479			264126
69.3926			262526
69.6373			260935
69.882			259355
70.1268			257793
70.3714			256249
70.6162			254718
70.8609			253199
71.1056			251689
71.3503			250190
71.595			248703
71.8397			247229
72.0844			245768
72.3291			244323
72.5738			242898
72.8185			241494
73.0632			240110
73.3079			238743
73.5526			237391
73.7973			236055
74.042			234733
74.2867			233416
74.5314			232097
74.7761			230776
75.0208			229457
75.2656			228145
75.5103			226847
75.755			225561
75.9997			224284
76.2444			223016
76.4891			221757
76.7338			220504
76.9785			219252
77.2232			217993
77.4679			216719
77.7126			215431
77.9573			214130
78.202			212821
78.4467			211504
78.6914			210180
78.9361			208854
79.1808			207528
79.4255			206204
79.6702			204877
79.915			203548
80.1596			202217
80.4044			200890
80.6491			199570
80.8938			198260
81.1385			196956
81.3832			195658
81.6279			194364
81.8726			193080
82.1173			191808
82.362			190545
82.6067			189287
82.8514			188031
83.0961			186783
83.3408			185549
83.5855			184334
83.8302			183132
84.0749			181939
84.3196			180748
84.5644			179561
84.809			178381
85.0538			177208
85.2985			176037
85.5432			174864
85.7879			173688
86.0326			172511
86.2773			171336
86.522			170162
86.7667			168987
87.0114			167813
87.2561			166645
87.5008			165484
87.7455			164331
87.9902			163188
88.2349			162057
88.4796			160942
88.7243			159839
88.969			158747
89.2137			157663
89.4584			156588
89.7032			155524
89.9479			154468
90.1926			153418
90.4373			152372
90.682			151329
90.9267			150290
91.1714			149254
91.4161			148220
91.6608			147187
91.9055			146155
92.1502			145124
92.3949			144097
92.6396			143075
92.8843			142060
93.129			141051
93.3737			140047
93.6184			139049
93.8631			138057
94.1078			137071
94.3525			136089
94.5973			135113
94.842			134143
95.0867			133178
95.3314			132216
95.5761			131254
95.8208			130293
96.0655			129333
96.3102			128377
96.5549			127366
96.7996			126287
97.0443			125194
97.289			124097
97.5337			122997
97.7784			121892
98.0231			120778
25.0788				188472
25.3235				188155
25.5682				187845
25.8129				187540
26.0576				187241
26.3023				186946
26.547				186654
26.7917				186376
27.0364				186199
27.2811				186071
27.5258				185992
27.7705				185965
28.0152				185989
28.2599				186061
28.5047				186174
28.7494				186321
28.9941				186494
29.2388				186695
29.4835				186930
29.7282				187202
29.9729				187507
30.2176				187841
30.4623				188207
30.707				188618
30.9517				189078
31.1964				189586
31.4411				190137
31.6858				190726
31.9305				191354
32.1752				192024
32.4199				192741
32.6646				193501
32.9093				194296
33.154				195131
33.3987				196017
33.6435				196962
33.8882				197977
34.1329				199064
34.3776				200223
34.6223				201458
34.867				202769
35.1117				204156
35.3564				205617
35.6011				207144
35.8458				208736
36.0905				210391
36.3352				212104
36.5799				213875
36.8246				215715
37.0693				217632
37.314				219625
37.5587				221693
37.8034				223834
38.0481				226045
38.2929				228330
38.5376				230687
38.7823				233114
39.027				235608
39.2717				238174
39.5164				240821
39.7611				243549
40.0058				246349
40.2505				249213
40.4952				252142
40.7399				255137
40.9846				258201
41.2293				261324
41.474				264490
41.7187				267690
41.9634				270922
42.2081				274197
42.4528				277523
42.6975				280898
42.9422				284309
43.187				287736
43.4317				291169
43.6764				294607
43.9211				298062
44.1658				301537
44.4105				305021
44.6552				308501
44.8999				311962
45.1446				315395
45.3893				318796
45.634				322163
45.8787				325475
46.1234				328703
46.3681				331831
46.6128				334846
46.8575				337746
47.1022				340536
47.3469				343219
47.5916				345795
47.8363				348252
48.081				350581
48.3258				352783
48.5705				354863
48.8152				356821
49.0599				358647
49.3046				360332
49.5493				361871
49.794				363262
50.0387				364513
50.2834				365628
50.5281				366600
50.7728				367423
51.0175				368114
51.2622				368695
51.5069				369176
51.7516				369558
51.9963				369841
52.241				370033
52.4857				370146
52.7304				370181
52.9751				370134
53.2199				369996
53.4646				369765
53.7093				369451
53.954				369075
54.1987				368644
54.4434				368152
54.6881				367602
54.9328				367014
55.1775				366398
55.4222				365749
55.6669				365058
55.9116				364305
56.1563				363481
56.401				362591
56.6457				361638
56.8904				360614
57.1351				359505
57.3798				358296
57.6245				356996
57.8693				355619
58.114				354168
58.3587				352649
58.6034				351068
58.8481				349425
59.0928				347730
59.3375				346000
59.5822				344247
59.8269				342480
60.0716				340703
60.3163				338919
60.561				337130
60.8057				335332
61.0504				333525
61.2951				331723
61.5398				329932
61.7845				328142
62.0292				326348
62.2739				324545
62.5187				322729
62.7634				320897
63.0081				319046
63.2528				317168
63.4975				315258
63.7422				313316
63.9869				311356
64.2316				309398
64.4763				307446
64.721				305502
64.9657				303578
65.2104				301684
65.4551				299828
65.6998				298009
65.9445				296215
66.1892				294437
66.4339				292678
66.6786				290942
66.9233				289234
67.168				287551
67.4128				285879
67.6575				284207
67.9022				282531
68.1469				280854
68.3916				279182
68.6363				277511
68.881				275831
69.1257				274140
69.3704				272441
69.6151				270744
69.8598				269057
70.1045				267385
70.3492				265728
70.5939				264079
70.8386				262433
71.0833				260791
71.328				259155
71.5727				257528
71.8174				255911
72.0621				254310
72.3068				252723
72.5516				251145
72.7963				249576
73.041				248012
73.2857				246452
73.5304				244896
73.7751				243347
74.0198				241806
74.2645				240276
74.5092				238758
74.7539				237254
74.9986				235767
75.2433				234296
75.488				232835
75.7327				231382
75.9774				229934
76.2221				228482
76.4668				227021
76.7115				225553
76.9562				224082
77.201				222617
77.4457				221161
77.6904				219717
77.9351				218285
78.1798				216866
78.4245				215454
78.6692				214049
78.9139				212652
79.1586				211258
79.4033				209862
79.648				208462
79.8927				207058
80.1374				205653
80.3821				204249
80.6268				202851
80.8715				201458
81.1162				200069
81.3609				198684
81.6056				197302
81.8503				195918
82.0951				194527
82.3397				193128
82.5845				191728
82.8292				190336
83.0739				188957
83.3186				187591
83.5633				186239
83.808				184903
84.0527				183587
84.2974				182289
84.5421				181005
84.7868				179724
85.0315				178439
85.2762				177150
85.5209				175863
85.7656				174582
86.0103				173304
86.255				172024
86.4997				170740
86.7444				169453
86.9891				168168
87.2339				166883
87.4786				165599
87.7233				164314
87.968				163029
88.2127				161749
88.4574				160476
88.7021				159213
88.9468				157960
89.1915				156721
89.4362				155498
89.6809				154286
89.9256				153084
90.1703				151893
90.415				150717
90.6597				149557
90.9044				148411
91.1491				147273
91.3938				146136
91.6385				144993
91.8833				143846
92.128				142699
92.3727				141553
92.6174				140407
92.8621				139263
93.1068				138124
93.3515				136991
93.5962				135863
93.8409				134740
94.0856				133621
94.3303				132501
94.575				131383
94.8197				130273
95.0644				129179
95.3091				128105
95.5538				127051
95.7985				126012
96.0432				124983
96.2879				123962
96.5326				122904
96.7773				121800
97.0221				120687
97.2668				119569
97.5115				118448
97.7562				117322
98.0009				116188
25.1024					188472
25.3471					188292
25.5918					188120
25.8365					187954
26.0812					187793
26.3259					187637
26.5706					187485
26.8153					187352
27.06					187321
27.3047					187331
27.5494					187373
27.7942					187444
28.0389					187549
28.2836					187689
28.5283					187856
28.773					188038
29.0177					188234
29.2624					188449
29.5071					188688
29.7518					188959
29.9965					189269
30.2412					189618
30.4859					190011
30.7306					190454
30.9753					190954
31.22					191510
31.4647					192118
31.7094					192767
31.9541					193453
32.1988					194169
32.4436					194910
32.6883					195679
32.933					196479
33.1777					197313
33.4224					198192
33.6671					199124
33.9118					200111
34.1565					201159
34.4012					202272
34.6459					203448
34.8906					204687
35.1353					205987
35.38					207348
35.6247					208775
35.8694					210264
36.1141					211809
36.3588					213415
36.6035					215086
36.8482					216824
37.0929					218628
37.3376					220503
37.5824					222445
37.8271					224457
38.0718					226548
38.3165					228732
38.5612					231014
38.8059					233384
39.0506					235833
39.2953					238352
39.54					240937
39.7847					243586
40.0294					246296
40.2741					249061
40.5188					251871
40.7635					254724
41.0082					257633
41.2529					260604
41.4976					263635
41.7423					266719
41.987					269854
42.2317					273044
42.4765					276278
42.7212					279549
42.9659					282851
43.2106					286186
43.4553					289555
43.7					292957
43.9447					296396
44.1894					299863
44.4341					303354
44.6788					306870
44.9235					310408
45.1682					313945
45.4129					317451
45.6576					320907
45.9023					324307
46.147					327646
46.3917					330927
46.6364					334144
46.8811					337279
47.1258					340308
47.3706					343234
47.6153					346067
47.86					348806
48.1047					351443
48.3494					353964
48.5941					356350
48.8388					358596
49.0835					360708
49.3282					362699
49.5729					364566
49.8176					366275
50.0623					367813
50.307					369196
50.5517					370439
50.7964					371543
51.0411					372511
51.2858					373359
51.5305					374105
51.7752					374760
52.02					375312
52.2647					375748
52.5094					376056
52.7541					376231
52.9988					376288
53.2435					376252
53.4882					376126
53.7329					375908
53.9776					375616
54.2223					375275
54.467					374893
54.7117					374455
54.9564					373952
55.2011					373384
55.4458					372752
55.6905					372053
55.9352					371293
56.1799					370475
56.4246					369601
56.6693					368667
56.9141					367666
57.1588					366589
57.4035					365427
57.6482					364185
57.8929					362867
58.1376					361459
58.3823					359947
58.627					358336
58.8717					356645
59.1164					354905
59.3611					353131
59.6058					351319
59.8505					349455
60.0952					347549
60.3399					345629
60.5846					343729
60.8293					341855
61.074					339991
61.3187					338128
61.5634					336271
61.8081					334433
62.0529					332622
62.2976					330823
62.5423					329020
62.787					327209
63.0317					325398
63.2764					323591
63.5211					321777
63.7658					319932
64.0105					318048
64.2552					316134
64.4999					314215
64.7446					312302
64.9893					310390
65.234					308469
65.4787					306545
65.7234					304636
65.9681					302755
66.2128					300910
66.4575					299092
66.7023					297287
66.947					295493
67.1917					293720
67.4364					291981
67.6811					290285
67.9258					288623
68.1705					286979
68.4152					285349
68.6599					283738
68.9046					282152
69.1493					280594
69.394					279050
69.6387					277506
69.8834					275957
70.1281					274403
70.3728					272848
70.6175					271295
70.8622					269741
71.1069					268171
71.3517					266577
71.5964					264962
71.8411					263339
72.0858					261724
72.3305					260122
72.5752					258528
72.8199					256934
73.0646					255338
73.3093					253742
73.554					252163
73.7987					250612
74.0434					249081
74.2881					247562
74.5328					246054
74.7775					244561
75.0222					243091
75.2669					241643
75.5116					240210
75.7563					238788
76.001					237373
76.2458					235965
76.4905					234566
76.7352					233169
76.9799					231767
77.2246					230359
77.4693					228945
77.714					227529
77.9587					226116
78.2034					224699
78.4481					223274
78.6928					221843
78.9375					220420
79.1822					219011
79.4269					217615
79.6716					216229
79.9163					214848
80.161					213469
80.4057					212090
80.6504					210710
80.8952					209330
81.1399					207945
81.3846					206558
81.6293					205172
81.874					203786
82.1187					202399
82.3634					201020
82.6081					199663
82.8528					198327
83.0975					197004
83.3422					195689
83.5869					194383
83.8316					193084
84.0763					191788
84.321					190490
84.5657					189179
84.8104					187855
85.0551					186530
85.2998					185215
85.5445					183906
85.7892					182596
86.034					181284
86.2787					179979
86.5234					178686
86.7681					177402
87.0128					176118
87.2575					174825
87.5022					173526
87.7469					172233
87.9916					170956
88.2363					169692
88.481					168434
88.7257					167179
88.9704					165934
89.2151					164703
89.4598					163488
89.7045					162281
89.9492					161074
90.1939					159863
90.4386					158651
90.6834					157445
90.9281					156245
91.1728					155051
91.4175					153863
91.6622					152682
91.9069					151511
92.1516					150357
92.3963					149218
92.641					148090
92.8857					146974
93.1304					145866
93.3751					144762
93.6198					143663
93.8645					142568
94.1092					141476
94.3539					140387
94.5986					139305
94.8433					138235
95.088					137176
95.3327					136127
95.5774					135086
95.8221					134054
96.0669					133026
96.3116					131998
96.5563					130900
96.801					129724
97.0457					128533
97.2904					127338
97.5351					126139
97.7798					124934
98.0245					123717
25.0542						188472
25.2989						188150
25.5436						187835
25.7883						187527
26.033						187224
26.2777						186925
26.5224						186628
26.7671						186351
27.0118						186164
27.2565						186018
27.5012						185908
27.7459						185835
27.9906						185801
28.2353						185804
28.4801						185843
28.7248						185915
28.9695						186020
29.2142						186154
29.4589						186316
29.7036						186510
29.9483						186737
30.193						187003
30.4377						187310
30.6824						187659
30.9271						188053
31.1718						188489
31.4165						188966
31.6612						189483
31.9059						190039
32.1506						190631
32.3953						191258
32.64						191919
32.8847						192619
33.1294						193359
33.3742						194142
33.6189						194967
33.8636						195834
34.1083						196740
34.353						197688
34.5977						198683
34.8424						199731
35.0871						200837
35.3318						202007
35.5765						203248
35.8212						204564
36.0659						205951
36.3106						207408
36.5553						208934
36.8						210525
37.0447						212175
37.2894						213882
37.5341						215644
37.7788						217463
38.0236						219344
38.2683						221290
38.513						223307
38.7577						225395
39.0024						227552
39.2471						229776
39.4918						232065
39.7365						234419
39.9812						236836
40.2259						239316
40.4706						241856
40.7153						244451
40.96						247090
41.2047						249767
41.4494						252490
41.6941						255260
41.9388						258067
42.1835						260904
42.4282						263773
42.6729						266689
42.9177						269662
43.1624						272698
43.4071						275793
43.6518						278932
43.8965						282102
44.1412						285308
44.3859						288555
44.6306						291834
44.8753						295127
45.12						298419
45.3647						301711
45.6094						305005
45.8541						308299
46.0988						311589
46.3435						314860
46.5882						318097
46.8329						321291
47.0776						324435
47.3223						327523
47.567						330543
47.8118						333485
48.0565						336337
48.3012						339092
48.5459						341735
48.7906						344254
49.0353						346637
49.28						348873
49.5247						350953
49.7694						352873
50.0141						354628
50.2588						356222
50.5035						357663
50.7482						358954
50.9929						360100
51.2376						361106
51.4823						361974
51.727						362710
51.9717						363318
52.2164						363804
52.4611						364182
52.7058						364459
52.9506						364641
53.1953						364738
53.44						364757
53.6847						364707
53.9294						364595
54.1741						364425
54.4188						364191
54.6635						363879
54.9082						363484
55.1529						363012
55.3976						362478
55.6423						361891
55.887						361250
56.1317						360554
56.3764						359793
56.6211						358965
56.8658						358074
57.1105						357129
57.3552						356124
57.5999						355046
57.8447						353884
58.0894						352636
58.3341						351308
58.5788						349908
58.8235						348443
59.0682						346919
59.3129						345337
59.5576						343702
59.8023						342021
60.047						340299
60.2917						338540
60.5364						336746
60.7811						334921
61.0258						333074
61.2705						331212
61.5152						329337
61.7599						327458
62.0046						325581
62.2493						323706
62.4941						321834
62.7388						319966
62.9835						318100
63.2282						316229
63.4729						314349
63.7176						312457
63.9623						310550
64.207						308627
64.4517						306694
64.6964						304763
64.9411						302844
65.1858						300941
65.4305						299060
65.6752						297214
65.9199						295414
66.1646						293665
66.4093						291961
66.654						290295
66.8987						288652
67.1435						287021
67.3881						285401
67.6329						283785
67.8776						282167
68.1223						280545
68.367						278919
68.6117						277290
68.8564						275662
69.1011						274034
69.3458						272407
69.5905						270781
69.8352						269153
70.0799						267520
70.3246						265885
70.5693						264250
70.814						262618
71.0587						260994
71.3034						259382
71.5481						257780
71.7928						256187
72.0375						254606
72.2823						253044
72.527						251509
72.7717						250000
73.0164						248508
73.2611						247021
73.5058						245534
73.7505						244043
73.9952						242549
74.2399						241045
74.4846						239522
74.7293						237978
74.974						236420
75.2187						234863
75.4634						233320
75.7081						231787
75.9528						230262
76.1975						228743
76.4422						227232
76.6869						225729
76.9317						224230
77.1763						222730
77.4211						221225
77.6658						219717
77.9105						218208
78.1552						216706
78.3999						215216
78.6446						213734
78.8893						212260
79.134						210793
79.3787						209332
79.6234						207875
79.8681						206418
80.1128						204960
80.3575						203505
80.6022						202058
80.8469						200622
81.0916						199197
81.3363						197780
81.5811						196367
81.8257						194960
82.0704						193563
82.3152						192174
82.5599						190788
82.8046						189401
83.0493						188016
83.294						186643
83.5387						185286
83.7834						183945
84.0281						182611
84.2728						181280
84.5175						179951
84.7622						178629
85.0069						177314
85.2516						176003
85.4963						174693
85.741						173383
85.9857						172077
86.2304						170777
86.4751						169484
86.7198						168198
86.9646						166917
87.2093						165642
87.454						164376
87.6987						163116
87.9434						161862
88.1881						160613
88.4328						159371
88.6775						158138
88.9222						156912
89.1669						155693
89.4116						154480
89.6563						153278
89.901						152089
90.1457						150914
90.3904						149750
90.6351						148593
90.8798						147438
91.1245						146284
91.3692						145133
91.614						143984
91.8587						142834
92.1034						141684
92.3481						140537
92.5928						139398
92.8375						138268
93.0822						137147
93.3269						136032
93.5716						134922
93.8163						133816
94.061						132714
94.3057						131616
94.5504						130522
94.7951						129437
95.0398						128364
95.2845						127302
95.5292						126254
95.7739						125220
96.0186						124199
96.2633						123189
96.508						122185
96.7528						121169
96.9975						120150
97.2422						119131
97.4869						118112
97.7316						117092
97.9763						116071
25.1038							188472
25.3485							188196
25.5932							187924
25.8379							187656
26.0826							187392
26.3273							187131
26.572							186873
26.8167							186623
27.0614							186437
27.3061							186285
27.5508							186163
27.7955							186069
28.0402							185999
28.2849							185953
28.5296							185929
28.7744							185922
29.0191							185934
29.2638							185969
29.5085							186032
29.7532							186130
29.9979							186267
30.2426							186446
30.4873							186666
30.732							186926
30.9767							187227
31.2214							187567
31.4661							187945
31.7108							188356
31.9555							188800
32.2002							189275
32.4449							189780
32.6896							190312
32.9343							190872
33.179							191465
33.4237							192094
33.6684							192763
33.9132							193472
34.1579							194218
34.4026							195003
34.6473							195834
34.892							196716
35.1367							197656
35.3814							198656
35.6261							199716
35.8708							200837
36.1155							202018
36.3602							203261
36.6049							204570
36.8496							205944
37.0943							207376
37.339							208863
37.5837							210405
37.8284							212005
38.0731							213662
38.3178							215378
38.5626							217155
38.8073							218993
39.052							220891
39.2967							222848
39.5414							224862
39.7861							226923
40.0308							229032
40.2755							231188
40.5202							233387
40.7649							235624
41.0096							237891
41.2543							240187
41.499							242515
41.7437							244881
41.9884							247283
42.2331							249716
42.4778							252181
42.7225							254675
42.9672							257202
43.212							259769
43.4567							262379
43.7014							265034
43.9461							267734
44.1908							270480
44.4355							273275
44.6802							276124
44.9249							279020
45.1696							281962
45.4143							284942
45.659							287953
45.9037							290990
46.1484							294050
46.3931							297130
46.6378							300218
46.8825							303307
47.1272							306384
47.3719							309438
47.6166							312461
47.8613							315441
48.1061							318370
48.3508							321236
48.5955							324022
48.8402							326724
49.0849							329343
49.3296							331879
49.5743							334327
49.819							336668
50.0637							338881
50.3084							340957
50.5531							342893
50.7978							344684
51.0425							346314
51.2872							347765
51.5319							349028
51.7766							350113
52.0213							351045
52.266							351845
52.5107							352519
52.7554							353067
53.0001							353492
53.2449							353801
53.4896							354006
53.7343							354109
53.979							354105
54.2237							353992
54.4684							353774
54.7131							353465
54.9578							353082
55.2025							352637
55.4472							352138
55.6919							351593
55.9366							351008
56.1813							350382
56.426							349706
56.6707							348971
56.9154							348174
57.1601							347316
57.4048							346393
57.6495							345400
57.8942							344333
58.139							343193
58.3837							341989
58.6284							340726
58.8731							339402
59.1178							338012
59.3625							336554
59.6072							335035
59.8519							333467
60.0966							331859
60.3413							330218
60.586							328547
60.8307							326855
61.0754							325153
61.3201							323450
61.5648							321754
61.8095							320068
62.0542							318391
62.2989							316717
62.5436							315043
62.7884							313365
63.0331							311684
63.2778							309998
63.5225							308308
63.7672							306616
64.0119							304923
64.2566							303227
64.5013							301533
64.746							299846
64.9907							298171
65.2354							296511
65.4801							294863
65.7248							293220
65.9695							291576
66.2142							289936
66.4589							288305
66.7036							286690
66.9483							285094
67.193							283510
67.4377							281931
67.6825							280356
67.9272							278786
68.1719							277222
68.4166							275660
68.6613							274092
68.906							272510
69.1507							270916
69.3954							269313
69.6401							267709
69.8848							266104
70.1295							264497
70.3742							262891
70.6189							261294
70.8636							259706
71.1083							258122
71.353							256539
71.5977							254953
71.8424							253368
72.0871							251790
72.3318							250224
72.5765							248665
72.8213							247111
73.066							245563
73.3107							244025
73.5554							242497
73.8001							240976
74.0448							239457
74.2895							237944
74.5342							236439
74.7789							234942
75.0236							233454
[truncated: 692 more rows]

## Sheet: Panel B
Cl- (mM)	Tm (K) replicate 1	Tm (K) replicate 2	Tm (K) replicate 3	Tm (K) replicate 4
0.003	317.295	317.178	317.345	317.228
0.01	317.103	316.985	317.006	317.328
0.03	317.589	317.907	317.639	317.227
0.1	317.835	317.422	317.738	317.619
0.3	318.759	318.345	318.517	317.956
1	319.736	320.197	319.932	319.517
3	320.953	320.827	320.857	321.316
10	321.783	321.95	321.979	322.146

## Sheet: Panel C
Temperature (˚C)	Normalized FI signal, WT, +Cl-	Normalized FI signal, WT, -Cl-	Normalized FI signal, T105A, +Cl-	Normalized FI signal, T105A, -Cl-
4	1	1	1	1
37	0.93629	0.98255	0.69	0.93
50	0.89728	0.1976	0.296	0.329
70	0	0.014478	0.0847	0.0813
90	0	0.001294	0.0389	0.0189

## Sheet: Panel D
Cl- (mM)	FRET index, replicate 1	FRET index, replicate 2	FRET index, replicate 3
0.001	1.01273	1.00629	0.990299
0.003	0.994535	0.992013	1.05615
0.01	0.995696	0.996275	0.993701
0.03	0.995898	0.999207	0.989536
0.1	1.01336	1.01243	1.00633
0.3	1.05797	1.02693	1.04045
1	1.03922	1.04793	1.06201
3	1.09298	1.08034	1.07684
10	1.11378	1.11999	1.10344

## Sheet: Panel E
	FRET index increase(%), replicate 1	FRET index increase(%), replicate 2	FRET index increase(%), replicate 3
WT, Cl- 10 mM	6.60625	7.20113	5.61678
WT, L-Gln 1 mM	15.3729	15.3453	16.1251
T105A, Cl- 10 mM	-0.116287	1.71241	2.77522
T105A, L-Gln 1 mM	1.38207	2.87445	2.55239

## Sheet: Panel F
L-Gln (µM)	FRET index, +Cl-, replicate 1	FRET index, +Cl-, replicate 2	FRET index, +Cl-, replicate 3	FRET index, -Cl-, replicate 1	FRET index, -Cl-, replicate 2	FRET index, -Cl-, replicate 3
0.01	1.08309	1.08972	1.08087	0.858576	0.918724	0.912261
0.03	1.078	1.14206	1.10617	0.869582	0.876363	0.856425
0.1	1.07052	1.06575	1.07174	0.86538	0.869473	0.870392
0.3	1.08651	1.08291	1.0918	0.883598	0.921751	0.87036
1	1.14469	1.10049	1.10197	0.915218	0.931762	0.88591
3	1.12688	1.12205	1.12222	0.907575	1.00853	0.889222
10	1.14297	1.2049		1.00812	0.977583	0.941759
30	1.14781	1.22536	1.17197	0.989845	0.999392	1.03906
100	1.19717	1.18097	1.18164	1.03626	1.00117	1.00014
300				1.00319	1.07002	0.985077
1000				1.03239	1.06266	1.01054
