# Supplementary material for: Chloride ions evoke taste sensations by binding to the extracellular ligand-binding domain of sweet/umami taste receptors
Source: eLife. 2023 Feb 28;12:e84291. doi: 10.7554/eLife.84291 (PMC9977269; doi:10.7554/eLife.84291)
Supplement: Figure 4—source data 1. [file elife-84291-fig4-data1.xlsx]

## Sheet: Panel B
ligand	concentration (mM)	CT nerve 1, Impulses/10 s	CT nerve 2, Impulses/10 s	CT nerve 3, Impulses/10 s	CT nerve 4, Impulses/10 s	CT nerve 5, Impulses/10 s	CT nerve 6, Impulses/10 s	CT nerve 7, Impulses/10 s	CT nerve 8, Impulses/10 s	CT nerve 9, Impulses/10 s	CT nerve 10, Impulses/10 s	CT nerve 11, Impulses/10 s	CT nerve 12, Impulses/10 s	CT nerve 13, Impulses/10 s	CT nerve 14, Impulses/10 s	CT nerve 15, Impulses/10 s	CT nerve 16, Impulses/10 s	CT nerve 17, Impulses/10 s	CT nerve 18, Impulses/10 s	CT nerve 19, Impulses/10 s	CT nerve 20, Impulses/10 s	CT nerve 21, Impulses/10 s
NMDG-Cl	0.01	2	3		4	1	0	6
NMDG-Cl	0.03	3	2		9	4	5	8
NMDG-Cl	0.1	5	9		7	11	8	10
NMDG-Cl	1	11	8		7	13	8	10
NMDG-Cl	10	15	8	10	13	12	8	10
NMDG-Cl	100		12			13	5	12
NMDG-Cl, +Gur	0.01		3		3	0	0	4
NMDG-Cl, +Gur	0.03		4		3	0	1	2
NMDG-Cl, +Gur	0.1		4		2	0	2	2
NMDG-Cl, +Gur	1		5		0	3	2	3
NMDG-Cl, +Gur	10	3	1	3	2	5	4	3
NMDG-Cl, +Gur	100		1		0	6		6
NMDG-Gluconate	0.01	0	0	0	0	0
NMDG-Gluconate	0.03	3	0	5	2	0
NMDG-Gluconate	0.1	3	4	0	3	4
NMDG-Gluconate	1	3	4	0	1	0
NMDG-Gluconate	10	0	9	1	4	3
NMDG-Gluconate	100	5	9	8	3	18
NaCl	0.01										3	4	7		3		0					2
NaCl	0.03									3	9	8	2		3		1
NaCl	0.1									8	5	12	8		4		7
NaCl	1									7	5	20	7		7		5
NaCl	10									7			10	21	7		7
NaCl	100									7		9		11	6		8
KCl	0.01								1									4	2	3	5	0
KCl	0.03								3							7		2	3	7	10
KCl	0.1								4							7		5	12	12	7
KCl	1								7					12		9		6	11	12	6
KCl	10								14					9		11		6	11	10	6
KCl	100													8				7	10	10	8
NaCl, +Gur	0.01									4	2	0	2		0		1
NaCl, +Gur	0.03									0	4	3	4		1		3
NaCl, +Gur	0.1									0	5	3	2		1		1
NaCl, +Gur	1									0	1	5	0	1	7		1
NaCl, +Gur	10									7	4	2	0	2	2		3
NaCl, +Gur	100										4		6	2	2		4
KCl, +Gur	0.01								1							0		1			3	1
KCl, +Gur	0.03								2							2		0	0		2
KCl, +Gur	0.1								0							4		0	2		4
KCl, +Gur	1								0					0		5		1	1		4
KCl, +Gur	10								3				0	0		7		1	2		3
KCl, +Gur	100												0					1	1		5

## Sheet: Panel C
ligand	concentration (mM)	CT nerve 1, Impulses/10 s	CT nerve 2, Impulses/10 s	CT nerve 3, Impulses/10 s	CT nerve 4, Impulses/10 s	CT nerve 5, Impulses/10 s
NMDG-Cl	0.01	1	4	2	0	0
NMDG-Cl	0.03	2	5	0	2	6
NMDG-Cl	0.1	1	5	1	0	5
NMDG-Cl	1	1	2	7	1	2
NMDG-Cl	10	3	2	10	2	0
NMDG-Cl	100	1	5	9	1	8
NMDG-Cl, +Gur	0.01	1	1	1		0
NMDG-Cl, +Gur	0.03	5	3	3		1
NMDG-Cl, +Gur	0.1	2	3	2		2
NMDG-Cl, +Gur	1	4	5	3		6
NMDG-Cl, +Gur	10	4	2	6		5
NMDG-Cl, +Gur	100	1	2	5		8
NMDG-Gluconate	0.01	1	0	2	0	5
NMDG-Gluconate	0.03	2	0	0	0	8
NMDG-Gluconate	0.1	0	3	3	0	8
NMDG-Gluconate	1	6	1	7	0	5
NMDG-Gluconate	10	1	3	0	0	8
NMDG-Gluconate	100	5	2	0	3	10

## Sheet: Panel D
ligand	WT CT nerve 1, Impulses/10 s	WT CT nerve 2, Impulses/10 s	WT CT nerve 3, Impulses/10 s	WT CT nerve 4, Impulses/10 s	WT CT nerve 5, Impulses/10 s	WT CT nerve 6, Impulses/10 s	T1R3-KO CT nerve 1, Impulses/10 s	T1R3-KO CT nerve 2, Impulses/10 s	T1R3-KO CT nerve 3, Impulses/10 s	T1R3-KO CT nerve 4, Impulses/10 s	T1R3-KO CT nerve 5, Impulses/10 s
L-Gln	12	12	10				6	5	3	0	3
L-Gln + NMDG-Cl	19	17	18				5	5	4	1	5
sucrose				10	10	14	2	4	8		4
sucrose+ NMDG-Cl				17	15	24	5	3	12		8
L-Gln + Gur	3	5	4
L-Gln + NMDG-Cl + Gur	2	2	8
sucrose +Gur				0	1	2
sucrose+ NMDG-Cl + Gur				4	2	6

## Sheet: Panel E
	water (g), -Gur	NMDG-Cl (g), -Gur	water (g), +Gur	NMDG-Cl (g), +Gur
mouse 1	0.19	0.6	0.18	0.204
mouse 2	0.05	0.91	0.144	0.12
mouse 3	0.01	0.27	0.192	0.204
mouse 4	0.17	0.58	0.18	0.42
mouse 5	0.1	0.98	0.156	0.192
mouse 6	0.14	0.35	0.384	0.216
mouse 7	0.32	0.6	0.6	0.192
mouse 8	0.11	0.59	0.12	0.168
mouse 9	0.16	0.36	0.228	0.204

## Sheet: Panel F
	Preference ratio (%), -Gur	Preference ratio (%), +Gur
mouse 1	75.9494	53.125
mouse 2	94.7917	45.4545
mouse 3	96.4286	51.5152
mouse 4	77.3333	70
mouse 5	90.7407	55.1724
mouse 6	71.4286	36
mouse 7	65.2174	24.2424
mouse 8	84.2857	58.3333
mouse 9	69.2308	47.2222
